# Supplementary material for: MACE-Seq-based coding RNA and TrueQuant-based small RNA profiles in breast cancer: tumor-suppressive miR-1275 identified as a novel marker&nbsp;
Source: Research Square preprint supplement (doi:10.21203/rs.3.rs-109521/v1), 2020-12-03
Supplement: Supplementary file 1 [file a61a0892de0dd13675915f2f.docx]

**Patient Consent for Publication**

**Note:** Patients have the right to refuse to sign this consent form; refusal to sign this form will not affect their care in any way.

- I hereby give my consent for images or other clinical information relating to my case to be reported in a medical publication.
- I understand that my name and initials will not be published and that efforts will be made to conceal my identity, but that anonymity cannot be guaranteed.
- I understand that the material may be published in a journal, Web site or other form of publication. As a result, I understand that the material may be seen by the general public.
- I understand that the material may be included in medical books.

**Name of the patient:**

**Patient’s date of birth:**

**Signature of patient**:

(or signature of the person giving consent on behalf of the patient)

**Date:** / /2020

**If you are not the patient, what is your relationship to him or her?** (The person giving consent should be a substitute decision maker or legal guardian or should hold power of attorney for the patient).

**Why is the patient not able to give consent?** (e.g. is the patient a minor, incapacitated or deceased?)

**ڕازى بونی نەخۆش بۆ بڵاوكراوە**

تێبينى: نەخۆش مافيان هەيە تا ڕەزامەندى نیشان نەدات بۆ واژۆکردنی ئەم فۆرمە؛ ڕەت كردنەوەی واژۆکردنی ئەم فۆرمە كار لە چاودێرييان ناكات بە هیچ شێوەیەک.

- I understand that the material may be published in a journal, Web site or other form of publication. As a result, I understand that the material may be seen by the general public.
- I understand that the material may be included in medical books.

- من بەم بۆنەيەوە ڕەزامەنديى خۆم دەدەم بۆ وێنە يان زانياريى پزيشكيى ديكە پەيوەندى هەبێت بەحالەتى خۆم كە بڵاوبکرێتەوە لە بڵاوكراوەيێكى پزيشكى.
- من تێدەگەم كە ناوم بڵاوناكرێتەوە و كە هەوڵ دەدرێت تا ناسنامەمبشارنەوە.

من تێدەگەم كە ماددەكە لەوانەيە بڵاو بكرێتەوە لە گۆڤارێك، وێبسايت يان شێوەى ديكەى بڵاوكراوە. لە ئەنجامدا، من تێدەگەم كە ماددەكە لەوانەيە ببينرێت لەلايەنی گشتى.

• من تێ دەگەم كە ماددەكە لەوانەيە كتێبى پزيشكى بخەرێتە ناو.

ناوى نەخۆشەكە:

بەروارى نەخۆشى لەدايك بوون:

ئيمزاى نەخۆش:

(يان ئيمزاى كەسەكە دان ڕەزامەندى لە جياتى نەخۆشەكە)

بەروار: / ٢٠٢٠

ئەگەر تۆ نەخۆشەكە نيبيت، پەيوەنديى تۆ چى بۆ ئەو يانيە؟ (كەسەكە دان ڕەزامەندى دەبێتێك دروست كەرى بڕيارى بەديل بێت يان پارێزەرى ياسايى يان دەبێت تواناى بريكار بگرێت بۆ نەخۆشەكە).

بۆچى نەخۆشەكە نا بەتوانايە تا ڕەزامەندى بدات؟ (بۆ نموونە نەخۆشەكەيێك بچووكە، لاوازدەبێت يان مردوو؟)
